# Supplementary material for: Embryonic Stem Cell‐Derived Neural Stem Cells Fuse with Microglia and Mature Neurons
Source: Oxford University Press journal article supplement (doi:10.1002/stem.1227), 2012-09-07
Supplement: stmcls_30_12_2657_s9.pdf [file stmcls_30_12_2657_s9.pdf]

**Supplementary Table 1:** Electrophysiological parameters of fused NS/microglia and NS cells

| <b>Day 21 <i>in vitro</i></b>   | NS Cells (n = 6) | Fused Cells (n = 6)    |
|---------------------------------|------------------|------------------------|
| Resting membrane potential (mV) | -23.2 ± 1.6      | -21.1 ± 2.0            |
| Membrane capacitance (pF)       | 5.0 ± 0.9        | 4.9 ± 0.9              |
| Input resistance (MΩ)           | 3490 ± 251       | 1637 ± 231* p < 0.001  |
| <b>Day 24 <i>in vitro</i></b>   |                  |                        |
|                                 | NS Cells (n = 6) | Fused Cells (n = 6)    |
| Resting membrane potential (mV) | -24.5 ± 1.4      | -32.6 ± 2.9* p = 0.03  |
| Membrane capacitance (pF)       | 5.7 ± 0.3        | 6.3 ± 1.4              |
| Input resistance (MΩ)           | 2613 ± 319       | 1205 ± 204* p = 0.004  |
| <b>Day 27 <i>in vitro</i></b>   |                  |                        |
|                                 | NS Cells (n = 6) | Fused Cells (n = 6)    |
| Resting membrane potential (mV) | -24.7 ± 2.7      | -36.5 ± 3.6* p = 0.027 |
| Membrane capacitance (pF)       | 6.3 ± 0.7        | 6.6 ± 1.0              |
| Input resistance (MΩ)           | 3302 ± 386       | 1208 ± 519* p = 0.009  |

Means ± SEM. \*P < 0.05, unpaired *t*-test
