# Supplementary figures and images for: Embryonic Stem Cell‐Derived Neural Stem Cells Fuse with Microglia and Mature Neurons
Source: Oxford University Press journal article supplement (doi:10.1002/stem.1227), 2012-09-07

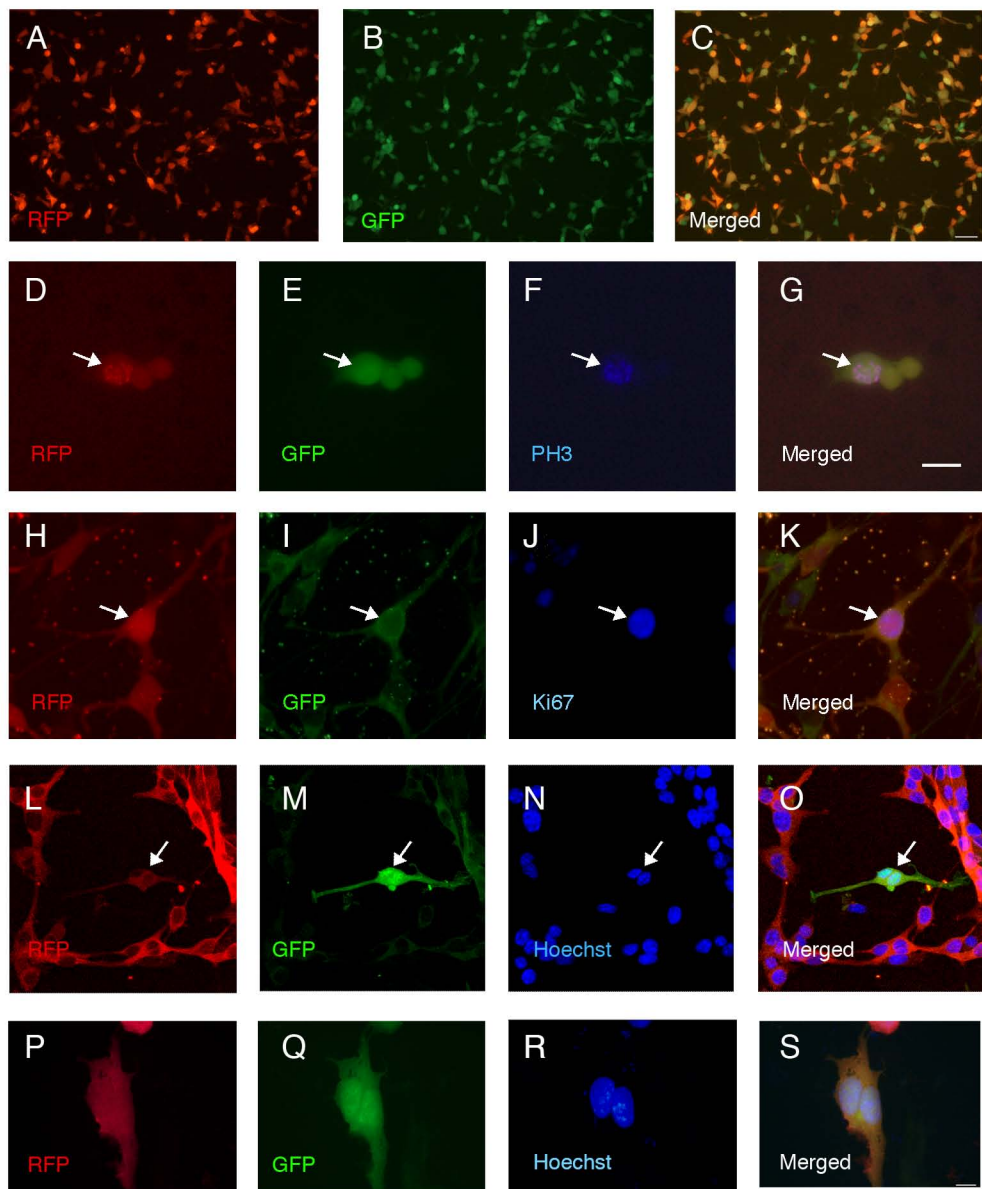

Fig.S1

Supplement: stmcls_30_12_2657_s1.pdf [file stmcls_30_12_2657_s1.pdf]

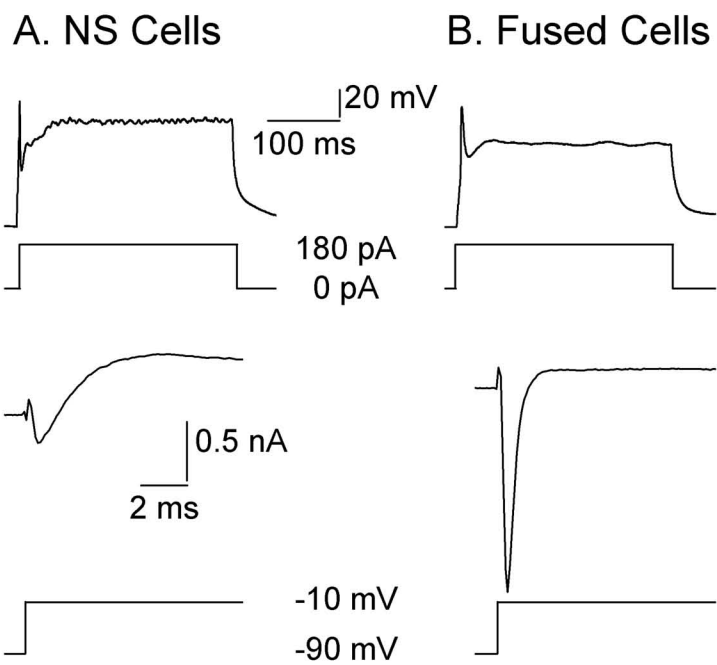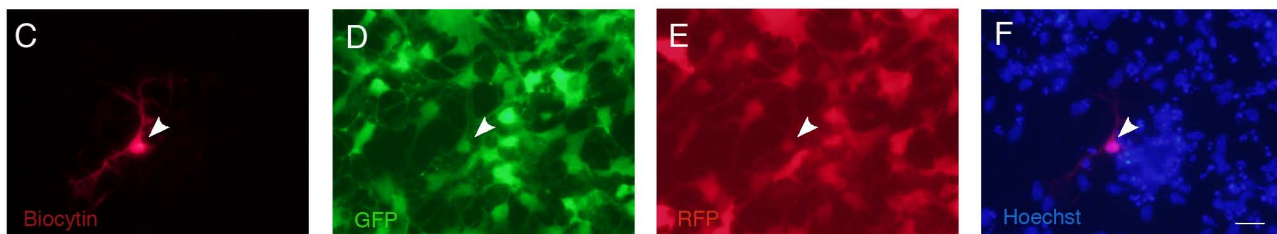

Fig. S3

Supplement: stmcls_30_12_2657_s3.pdf [file stmcls_30_12_2657_s3.pdf]

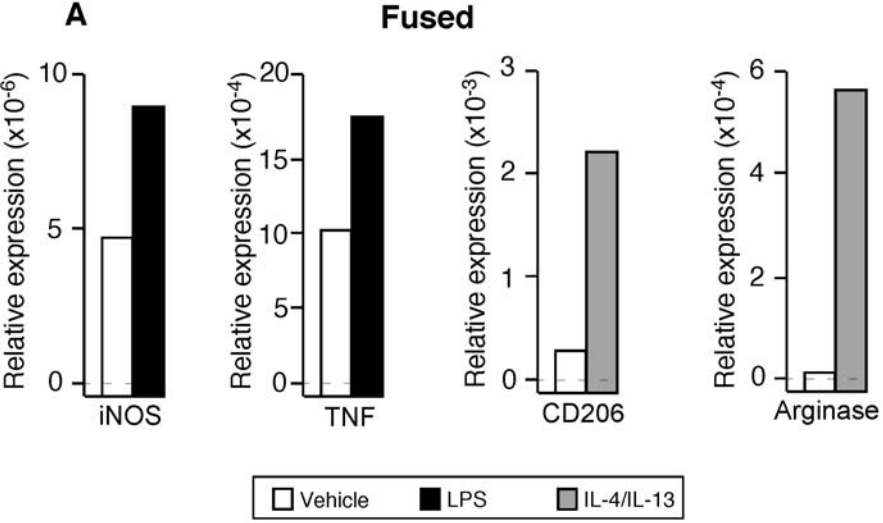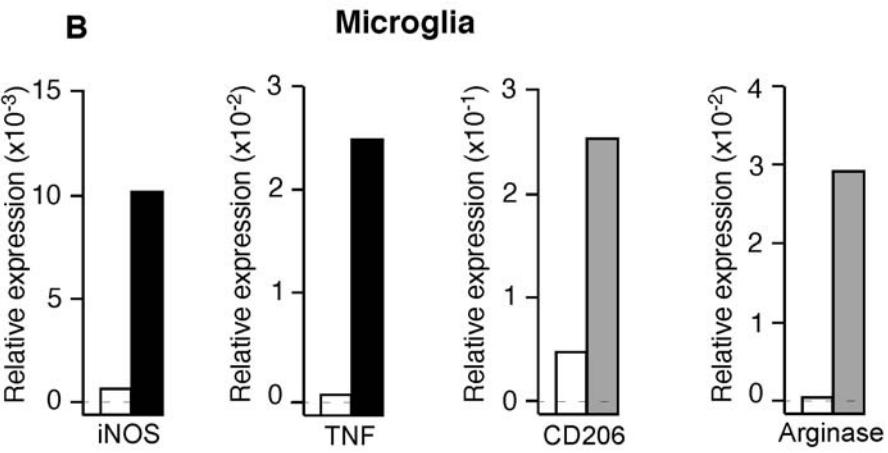

Fig. S4

Supplement: stmcls_30_12_2657_s4.pdf [file stmcls_30_12_2657_s4.pdf]

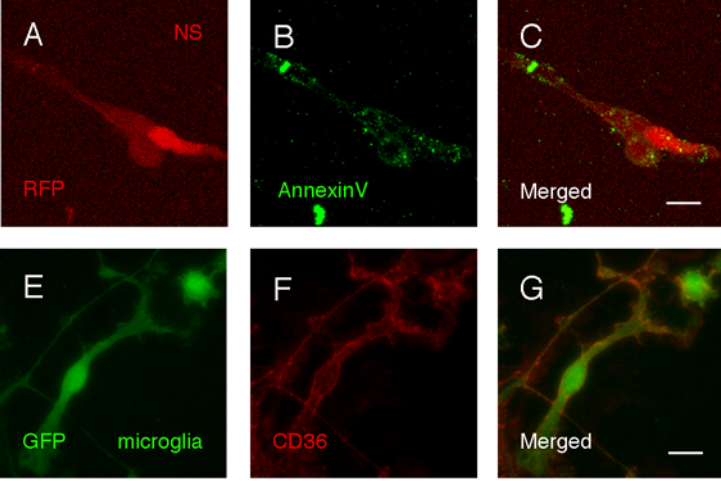

Fig.S5

Supplement: stmcls_30_12_2657_s5.pdf [file stmcls_30_12_2657_s5.pdf]

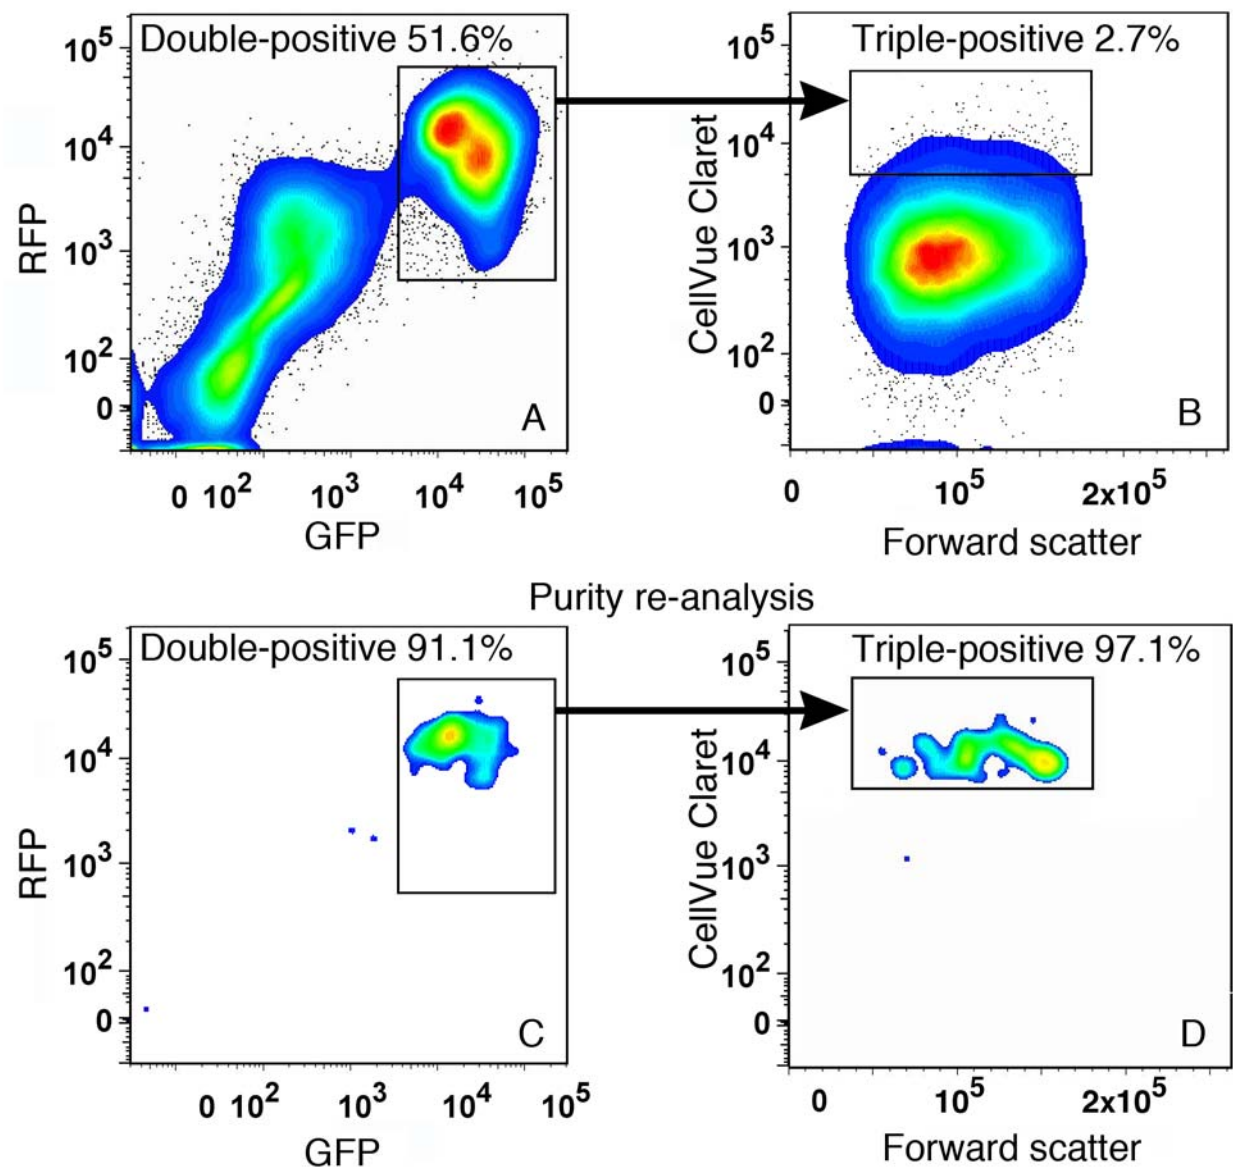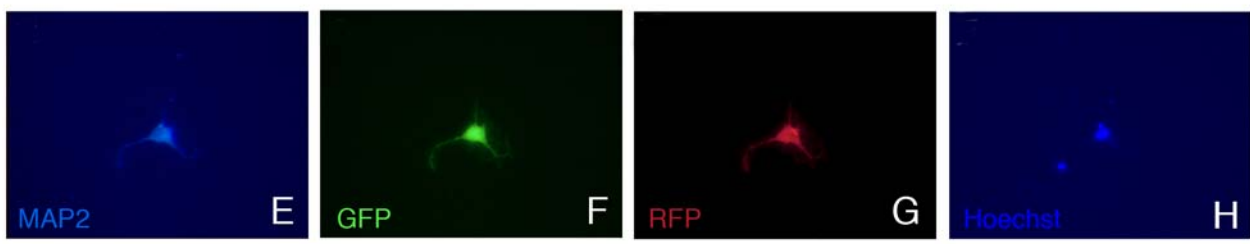

Fig. S6

Supplement: stmcls_30_12_2657_s6.pdf [file stmcls_30_12_2657_s6.pdf]

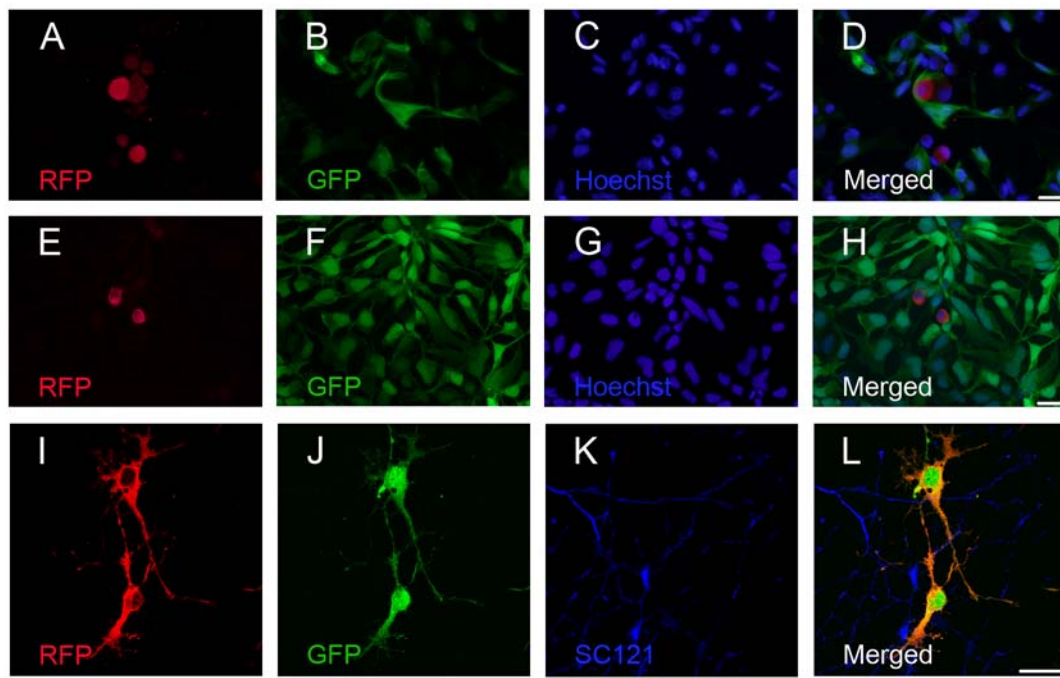

Fig.S7

Supplement: stmcls_30_12_2657_s7.pdf [file stmcls_30_12_2657_s7.pdf]

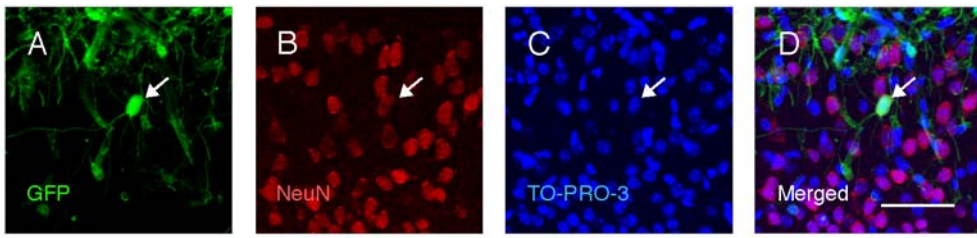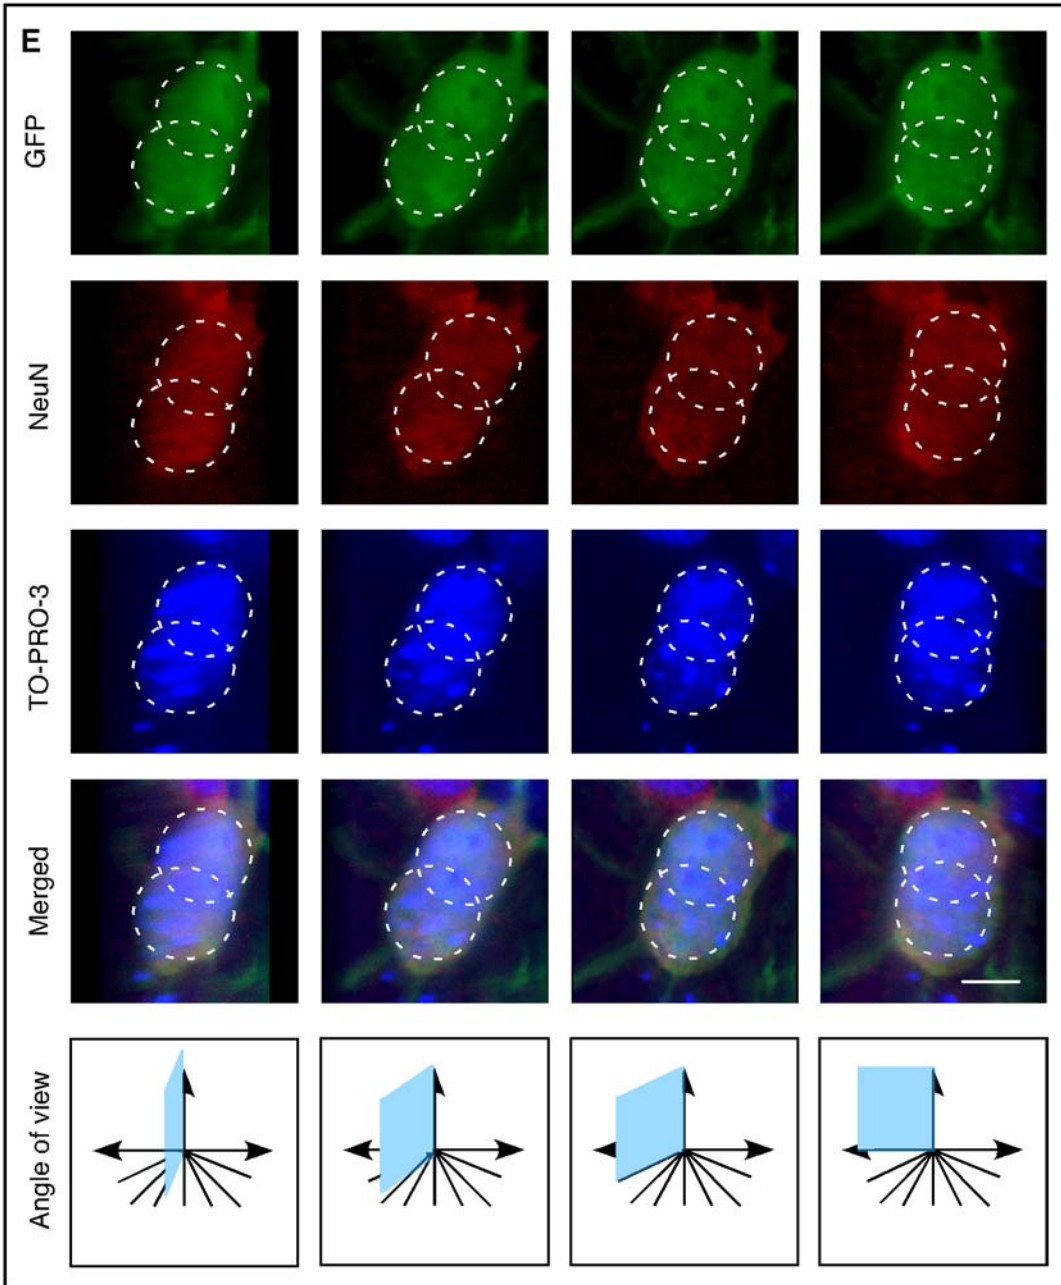

Fig.S8

Supplement: stmcls_30_12_2657_s8.pdf [file stmcls_30_12_2657_s8.pdf]
